# Supplementary material for: Duplex-specific nuclease signal amplification-based fluorescent lateral flow assay for the point-of-care detection of microRNAs
Source: Royal Society of Chemistry journal article supplement (doi:10.1039/d0an01673j), 2020-10-23
Supplement: d0an01673j1.pdf [file d0an01673j1.pdf]

## Electronic Supplementary Information

Duplex Specific Nuclease Signal Amplification-Based Fluorescent Lateral Flow  
Assay for Point-of-Care Detection of MicroRNA

Hongjuan Wei<sup>a,b,1</sup>, Yongjin Peng<sup>a,b,1</sup>, Zikun Bai<sup>a,b</sup>, Zhen Rong<sup>a,b,\*</sup>, Shengqi Wang<sup>a,b,\*</sup>

<sup>a</sup>Beijing Institute of Radiation Medicine, Beijing 100850, P. R. China.

<sup>b</sup>Beijing Key Laboratory of New Molecular Diagnosis Technologies for Infectious  
Diseases, Beijing 100850, P. R. China.

<sup>1</sup>These authors contributed equally to this work.

Corresponding author

\*Tel: +86-10-66932274. E-mail: sqwang@bmi.ac.cn (Shengqi Wang).

\*Tel: +86-10-66931422. E-mail: rongzhen0525@sina.com (Zhen Rong).

Table S1. The sequences of target/mismatched miRNAs and DNA probe

| miRNA/DNA         | Detail of sequences                                         |
|-------------------|-------------------------------------------------------------|
| miRNA-21          | 5'-UAGCUUAUCAGACUGAUGUUGA-3'                                |
| miRNA-141         | 5'-UAACACUGUCUGGUAAGAUGG-3'                                 |
| let-7d            | 5'-AGAGGUAGUAGGUUGCAUAGUU-3'                                |
| miRNA-200a        | 5'-UAACACUGUCUGGUAACGAUGU-3'                                |
| let-7b            | 5'-UGAGGUAGUAGGUUGUGUGGUU-3'                                |
| miRNA-21          | 5'-Digoxin-T <sub>10</sub> TCAACATCAGTCTGATAAGCTA-Biotin-3' |
| Complementary DNA |                                                             |

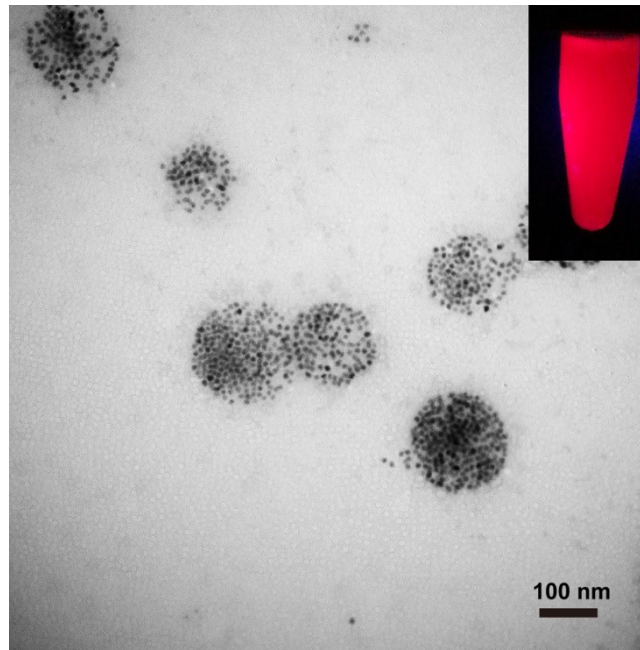

Figure S1. TEM image of QB615. Inset: photograph of QB615 under the excitation of a handheld 365 nm UV lamp (3 W).

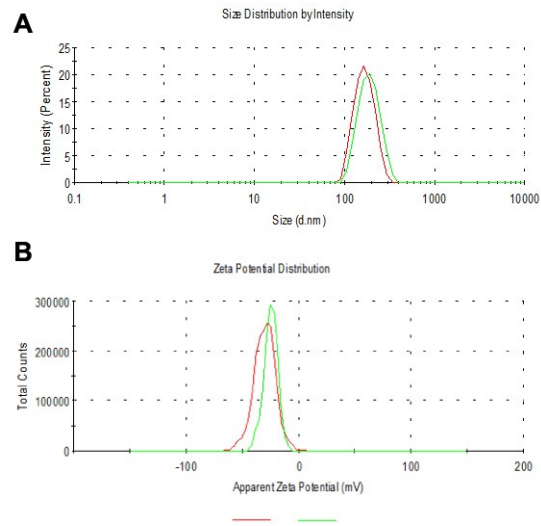

Figure S2. (A) DLS and (B) Zeta potential distributions of QB615 before (red line) and after antibody conjugation (green line).

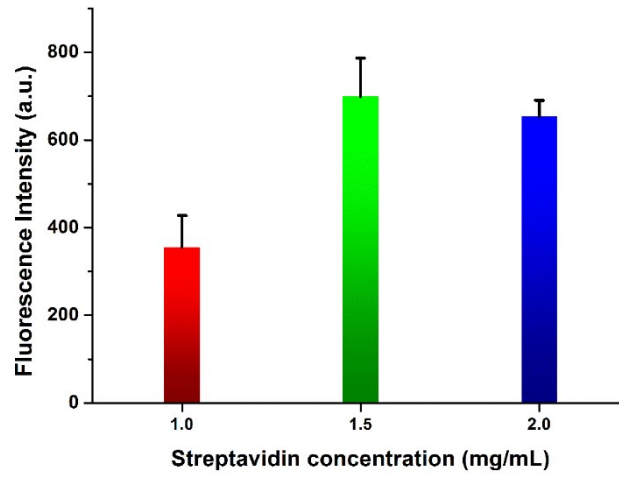

Figure S3. Optimization of streptavidin spotted on the test line. Error bars are standard deviation of three repetitive experiments.

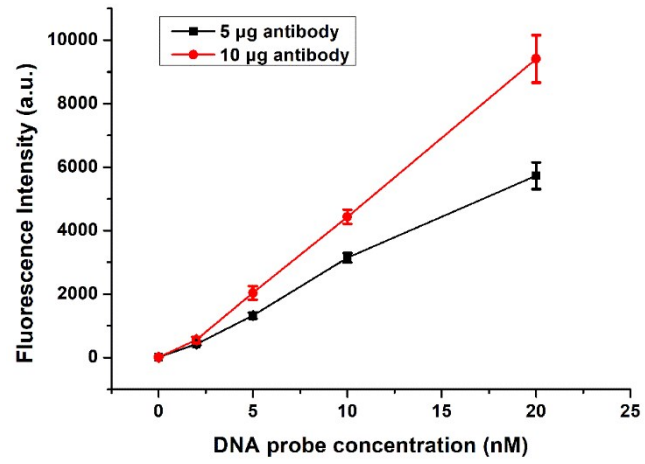

Figure S4. Optimization of digoxin antibody amount. Error bars are standard deviation of three repetitive experiments.
